# Supplementary material
Source: PubMed Central journal article supplement (PMC4154244)
Supplement: me-14-1024.pdf [file me-14-1024.pdf]

**Supplemental Figure 1. HA-FoxM1<sup>ΔNRD</sup> is not detectable in brain or liver of β-FoxM1\* mice.** HA immunolabeling (A, C, D, F, G and I) or secondary labeling only (B, E, and F) was performed on *RIP-rtTA* (A, D, and G) or β-FoxM1\*<sup>14</sup> (C, F, and I) brains (A-F) and liver (G-I). D, E, and F show increased resolution of the hypothalamic area from images A, B, and C, respectively.

**Supplemental Table 1. Genes significantly altered between β-FoxM1.** p-value <0.05 in conjunction with a q-value <0.1 was considered significant.

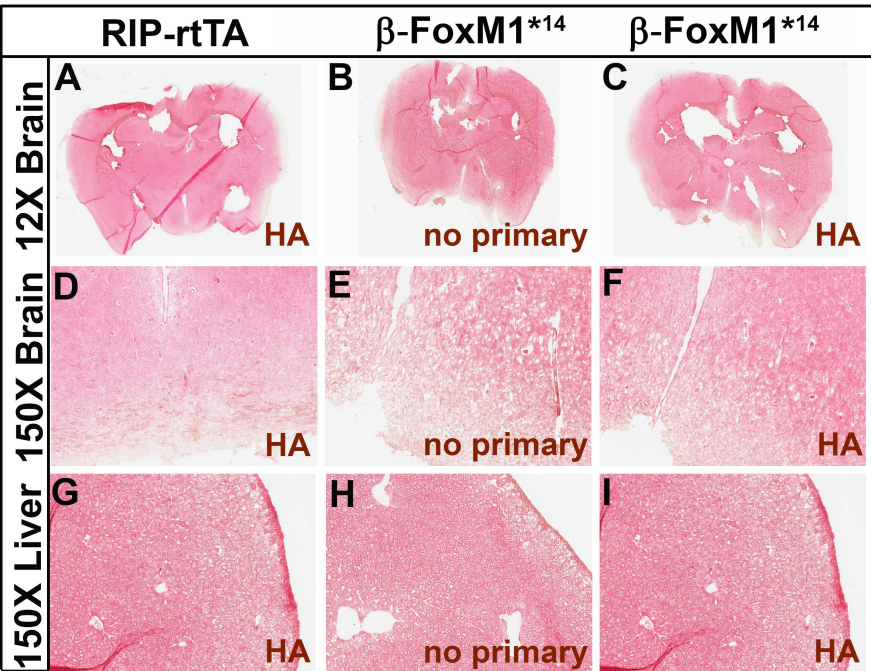

Golson et al., Supplementary Figure 1

| Gene Name     | Fold Change<br>(X <sup>.5</sup> ) | p-value | q-value |
|---------------|-----------------------------------|---------|---------|
| 4933413G19Rik | 7.44                              | 0.00    | 0.0000  |
| Akp3          | 6.58                              | 0.00    | 0.0000  |
| Foxm1         | 6.56                              | 0.00    | 0.0000  |
| Apoa4         | 6.33                              | 0.00    | 0.0000  |
| Alpi          | 6.09                              | 0.00    | 0.0000  |
| Clca3         | 5.29                              | 0.00    | 0.0000  |
| Kcnj5         | 4.39                              | 0.00    | 0.0000  |
| S100g         | 4.02                              | 0.00    | 0.0000  |
| Fcgbp         | 3.95                              | 0.00    | 0.0000  |
| Gm773         | 3.73                              | 0.00    | 0.0000  |
| Pck1          | 3.54                              | 0.00    | 0.0000  |
| Krt20         | 3.49                              | 0.00    | 0.0000  |
| Fabp2         | 3.39                              | 0.00    | 0.0000  |
| Fabp1         | 3.14                              | 0.00    | 0.0002  |
| Prap1         | 3.13                              | 0.00    | 0.0000  |
| Treh          | 3.11                              | 0.00    | 0.0000  |
| AI747448      | 3.07                              | 0.00    | 0.0005  |
| Adamdec1      | 2.99                              | 0.00    | 0.0001  |
| Cyp3a11       | 2.92                              | 0.00    | 0.0017  |
| Slc30a10      | 2.91                              | 0.00    | 0.0000  |
| Sis           | 2.82                              | 0.00    | 0.0006  |
| Cdh17         | 2.81                              | 0.00    | 0.0001  |
| Rbp2          | 2.80                              | 0.00    | 0.0000  |
| Apoc2         | 2.78                              | 0.00    | 0.0000  |
| Cd51          | 2.76                              | 0.00    | 0.0063  |
| Coch          | 2.75                              | 0.00    | 0.0000  |
| Guca2b        | 2.72                              | 0.00    | 0.0095  |
| Cdhr5         | 2.66                              | 0.00    | 0.0000  |
| Slc13a1       | 2.62                              | 0.00    | 0.0218  |
| Tm4sf5        | 2.61                              | 0.00    | 0.0011  |
| Mep1b         | 2.56                              | 0.00    | 0.0324  |
| Adh6a         | 2.56                              | 0.00    | 0.0324  |
| Igj           | 2.54                              | 0.00    | 0.0000  |
| Nr5a1         | 2.51                              | 0.00    | 0.0492  |
| Reg4          | 2.48                              | 0.00    | 0.0492  |
| Gdpd2         | 2.44                              | 0.00    | 0.0742  |
| Emr4          | 2.37                              | 0.00    | 0.0000  |
| Gm5506        | 2.28                              | 0.00    | 0.0000  |
| Clec2e        | 2.28                              | 0.00    | 0.0526  |
| Sell          | 2.11                              | 0.00    | 0.0780  |
| Tmprss15      | 2.07                              | 0.00    | 0.0775  |

|               |      |      |        |
|---------------|------|------|--------|
| Apoc3         | 2.03 | 0.00 | 0.0542 |
| Lct           | 2.00 | 0.00 | 0.0000 |
| Tff3          | 1.91 | 0.00 | 0.0000 |
| Cyp4f14       | 1.82 | 0.00 | 0.0063 |
| Adm2          | 1.81 | 0.00 | 0.0000 |
| Xlr4a         | 1.80 | 0.00 | 0.0017 |
| Cyp2d26       | 1.63 | 0.00 | 0.0158 |
| Myo1a         | 1.63 | 0.00 | 0.0008 |
| Muc13         | 1.62 | 0.00 | 0.0006 |
| Gm5801        | 1.59 | 0.00 | 0.0000 |
| Slc45a3       | 1.55 | 0.00 | 0.0025 |
| Cubn          | 1.53 | 0.00 | 0.0832 |
| Ctrc          | 1.43 | 0.00 | 0.0000 |
| Trib3         | 1.39 | 0.00 | 0.0000 |
| Cyp3a13       | 1.34 | 0.00 | 0.0183 |
| 1700001O22Rik | 1.30 | 0.00 | 0.0036 |
| Angptl7       | 1.30 | 0.00 | 0.0000 |
| Aldob         | 1.26 | 0.00 | 0.0001 |
| Aldh1a3       | 1.25 | 0.00 | 0.0000 |
| Slc7a11       | 1.23 | 0.00 | 0.0000 |
| E230016K23Rik | 1.17 | 0.00 | 0.0137 |
| Trnp1         | 1.15 | 0.00 | 0.0000 |
| Ankrd9        | 1.11 | 0.00 | 0.0314 |
| Extl1         | 1.10 | 0.00 | 0.0027 |
| Gdf15         | 1.08 | 0.00 | 0.0023 |
| Gm7120        | 1.06 | 0.00 | 0.0000 |
| Cd22          | 1.06 | 0.00 | 0.0319 |
| Slc7a3        | 1.05 | 0.00 | 0.0001 |
| Ifi2712a      | 1.03 | 0.00 | 0.0349 |
| Chrna4        | 0.99 | 0.00 | 0.0131 |
| Lrrc38        | 0.97 | 0.00 | 0.0047 |
| Aim11         | 0.96 | 0.00 | 0.0896 |
| Rbp7          | 0.92 | 0.00 | 0.0001 |
| Trim66        | 0.89 | 0.00 | 0.0001 |
| Gm16197       | 0.86 | 0.00 | 0.0016 |
| AA388235      | 0.86 | 0.00 | 0.0016 |
| Ovol2         | 0.86 | 0.00 | 0.0000 |
| Xist          | 0.84 | 0.00 | 0.0487 |
| Mrc1          | 0.83 | 0.00 | 0.0183 |
| Tsix          | 0.83 | 0.00 | 0.0324 |
| Vcam1         | 0.82 | 0.00 | 0.0014 |
| Caps2         | 0.82 | 0.00 | 0.0001 |
| Il16          | 0.81 | 0.00 | 0.0734 |

|               |       |      |        |
|---------------|-------|------|--------|
| Dusp26        | 0.76  | 0.00 | 0.0000 |
| Ccl28         | 0.76  | 0.00 | 0.0000 |
| Cartpt        | 0.75  | 0.00 | 0.0080 |
| Rnaset2b      | 0.74  | 0.00 | 0.0151 |
| Zbtb16        | 0.73  | 0.00 | 0.0184 |
| Odz4          | 0.72  | 0.00 | 0.0003 |
| Gldc          | 0.72  | 0.00 | 0.0185 |
| Rps18         | 0.71  | 0.00 | 0.0002 |
| Prex1         | 0.70  | 0.00 | 0.0002 |
| Grem2         | 0.70  | 0.00 | 0.0302 |
| Tbx1          | 0.67  | 0.00 | 0.0944 |
| Psat1         | 0.67  | 0.00 | 0.0011 |
| Itgad         | 0.66  | 0.00 | 0.0452 |
| Afm           | 0.66  | 0.00 | 0.0560 |
| H2-Q2         | 0.66  | 0.00 | 0.0006 |
| Hmox1         | 0.64  | 0.00 | 0.0077 |
| Tsku          | 0.62  | 0.00 | 0.0307 |
| Chac1         | 0.61  | 0.00 | 0.0031 |
| Myo7a         | 0.59  | 0.00 | 0.0106 |
| Atp6v0c-ps2   | 0.58  | 0.00 | 0.0060 |
| Vgf           | 0.58  | 0.00 | 0.0049 |
| H2-K1         | 0.57  | 0.00 | 0.0045 |
| Spsb1         | 0.56  | 0.00 | 0.0160 |
| Arl4d         | 0.56  | 0.00 | 0.0099 |
| Abtb2         | 0.53  | 0.00 | 0.0943 |
| Cldn6         | 0.52  | 0.00 | 0.0982 |
| Shmt2         | 0.52  | 0.00 | 0.0285 |
| Klf15         | 0.51  | 0.00 | 0.0379 |
| Cdkn1a        | 0.51  | 0.00 | 0.0330 |
| Eif4ebp1      | 0.49  | 0.00 | 0.0581 |
| 5830417I10Rik | 0.49  | 0.00 | 0.0566 |
| Lad1          | 0.48  | 0.00 | 0.0724 |
| H2-T22        | 0.47  | 0.00 | 0.0849 |
| H2-T9         | 0.47  | 0.00 | 0.0896 |
| Slc1a4        | 0.46  | 0.00 | 0.0931 |
| Cela1         | -0.45 | 0.00 | 0.0786 |
| Ahnak         | -0.46 | 0.00 | 0.0775 |
| Vim           | -0.46 | 0.00 | 0.0925 |
| Col6a2        | -0.47 | 0.00 | 0.0952 |
| Pde2a         | -0.48 | 0.00 | 0.0986 |
| Zeb2          | -0.49 | 0.00 | 0.0986 |
| Jam2          | -0.49 | 0.00 | 0.0464 |
| Cxcl12        | -0.50 | 0.00 | 0.0925 |

|               |       |      |        |
|---------------|-------|------|--------|
| Lyz2          | -0.50 | 0.00 | 0.0980 |
| Nsg2          | -0.51 | 0.00 | 0.0953 |
| Fosl2         | -0.51 | 0.00 | 0.0378 |
| Parm1         | -0.52 | 0.00 | 0.0691 |
| Zbtb20        | -0.52 | 0.00 | 0.0775 |
| Col6a3        | -0.53 | 0.00 | 0.0324 |
| Stmn2         | -0.53 | 0.00 | 0.0491 |
| Serpini2      | -0.53 | 0.00 | 0.0238 |
| Gfra2         | -0.54 | 0.00 | 0.0977 |
| Hand2         | -0.54 | 0.00 | 0.0925 |
| Arhgef10      | -0.54 | 0.00 | 0.0205 |
| Cilp          | -0.54 | 0.00 | 0.0239 |
| Col3a1        | -0.55 | 0.00 | 0.0081 |
| Col5a2        | -0.55 | 0.00 | 0.0276 |
| Akap6         | -0.57 | 0.00 | 0.0151 |
| Fam198b       | -0.57 | 0.00 | 0.0963 |
| Sik1          | -0.57 | 0.00 | 0.0069 |
| Aebp1         | -0.58 | 0.00 | 0.0302 |
| Adamts10      | -0.58 | 0.00 | 0.0175 |
| Npas4         | -0.59 | 0.00 | 0.0046 |
| Col5a1        | -0.59 | 0.00 | 0.0136 |
| Ptger3        | -0.59 | 0.00 | 0.0734 |
| C530028O21Rik | -0.59 | 0.00 | 0.0036 |
| 6330403A02Rik | -0.60 | 0.00 | 0.0218 |
| Abca8a        | -0.60 | 0.00 | 0.0078 |
| Kcna6         | -0.61 | 0.00 | 0.0542 |
| Plk2          | -0.61 | 0.00 | 0.0034 |
| Reg3d         | -0.61 | 0.00 | 0.0520 |
| Sncg          | -0.61 | 0.00 | 0.0160 |
| Slc18a3       | -0.62 | 0.00 | 0.0299 |
| Prep          | -0.62 | 0.00 | 0.0297 |
| Dcn           | -0.62 | 0.00 | 0.0036 |
| Prss3         | -0.62 | 0.00 | 0.0184 |
| Slc15a2       | -0.63 | 0.00 | 0.0134 |
| Npy           | -0.64 | 0.00 | 0.0108 |
| Col1a2        | -0.65 | 0.00 | 0.0006 |
| 4930539E08Rik | -0.65 | 0.00 | 0.0314 |
| Reep1         | -0.66 | 0.00 | 0.0119 |
| Mki67         | -0.66 | 0.00 | 0.0017 |
| Scn7a         | -0.66 | 0.00 | 0.0020 |
| Top2a         | -0.66 | 0.00 | 0.0023 |
| Dkk3          | -0.67 | 0.00 | 0.0106 |
| Scn2b         | -0.67 | 0.00 | 0.0361 |

|               |       |      |        |
|---------------|-------|------|--------|
| Srp54a        | -0.68 | 0.00 | 0.0244 |
| Zfhx4         | -0.69 | 0.00 | 0.0305 |
| Tmprss5       | -0.69 | 0.00 | 0.0642 |
| Avil          | -0.69 | 0.00 | 0.0063 |
| Cenpe         | -0.70 | 0.00 | 0.0644 |
| Fbln2         | -0.70 | 0.00 | 0.0007 |
| Rtp1          | -0.70 | 0.00 | 0.0061 |
| Ccdc141       | -0.71 | 0.00 | 0.0330 |
| Svep1         | -0.71 | 0.00 | 0.0099 |
| Adamts1       | -0.71 | 0.00 | 0.0001 |
| Lum           | -0.71 | 0.00 | 0.0083 |
| Adam11        | -0.71 | 0.00 | 0.0015 |
| Hdc           | -0.72 | 0.00 | 0.0447 |
| A930015D03Rik | -0.72 | 0.00 | 0.0073 |
| Dmbt1         | -0.73 | 0.00 | 0.0000 |
| Chl1          | -0.73 | 0.00 | 0.0005 |
| Cadm3         | -0.73 | 0.00 | 0.0016 |
| Lrrtm1        | -0.73 | 0.00 | 0.0307 |
| Cplx1         | -0.74 | 0.00 | 0.0052 |
| Add2          | -0.74 | 0.00 | 0.0539 |
| Kcnq5         | -0.74 | 0.00 | 0.0561 |
| Adap1         | -0.75 | 0.00 | 0.0775 |
| Cdh19         | -0.76 | 0.00 | 0.0074 |
| 3110047P20Rik | -0.76 | 0.00 | 0.0504 |
| St8sia2       | -0.76 | 0.00 | 0.0566 |
| Prph          | -0.76 | 0.00 | 0.0002 |
| Begain        | -0.76 | 0.00 | 0.0319 |
| Col1a1        | -0.77 | 0.00 | 0.0000 |
| Hmmr          | -0.77 | 0.00 | 0.0218 |
| Slc10a4       | -0.77 | 0.00 | 0.0063 |
| Serpina3n     | -0.77 | 0.00 | 0.0775 |
| Htra3         | -0.80 | 0.00 | 0.0025 |
| Nefl          | -0.81 | 0.00 | 0.0009 |
| Arhgap28      | -0.81 | 0.00 | 0.0780 |
| Rbpjl         | -0.83 | 0.00 | 0.0000 |
| Ptprt         | -0.83 | 0.00 | 0.0000 |
| Slc5a7        | -0.84 | 0.00 | 0.0001 |
| Hmgcs2        | -0.85 | 0.00 | 0.0018 |
| Olf78         | -0.85 | 0.00 | 0.0025 |
| Cnksr2        | -0.86 | 0.00 | 0.0699 |
| Lynx1         | -0.86 | 0.00 | 0.0002 |
| Phox2b        | -0.86 | 0.00 | 0.0081 |
| Vwf           | -0.86 | 0.00 | 0.0000 |

|               |       |      |        |
|---------------|-------|------|--------|
| Nos1          | -0.87 | 0.00 | 0.0000 |
| Reg1          | -0.89 | 0.00 | 0.0000 |
| Pdgfra        | -0.90 | 0.00 | 0.0013 |
| Aspm          | -0.90 | 0.00 | 0.0063 |
| Gm8801        | -0.91 | 0.00 | 0.0487 |
| Cenpf         | -0.92 | 0.00 | 0.0001 |
| Olfml1        | -0.94 | 0.00 | 0.0959 |
| Pgm5          | -0.94 | 0.00 | 0.0063 |
| H2-Q8         | -0.99 | 0.00 | 0.0000 |
| H2-Q1         | -1.00 | 0.00 | 0.0001 |
| Epha5         | -1.01 | 0.00 | 0.0023 |
| H2-Q10        | -1.02 | 0.00 | 0.0002 |
| Esco2         | -1.02 | 0.00 | 0.0521 |
| Rpph1         | -1.08 | 0.00 | 0.0789 |
| Chrm1         | -1.08 | 0.00 | 0.0006 |
| Sycp1         | -1.09 | 0.00 | 0.0037 |
| Ppp1r3b       | -1.10 | 0.00 | 0.0000 |
| AI662270      | -1.10 | 0.00 | 0.0649 |
| Igfbp6        | -1.11 | 0.00 | 0.0253 |
| Gm8909        | -1.11 | 0.00 | 0.0000 |
| Gm18756       | -1.13 | 0.00 | 0.0006 |
| 2410017I17Rik | -1.13 | 0.00 | 0.0355 |
| Scn1a         | -1.15 | 0.00 | 0.0619 |
| Apba2         | -1.21 | 0.00 | 0.0036 |
| Gm11127       | -1.24 | 0.00 | 0.0000 |
| 4833424O15Rik | -1.24 | 0.00 | 0.0210 |
| Col11a1       | -1.31 | 0.00 | 0.0104 |
| Lpcat2b       | -1.32 | 0.00 | 0.0565 |
| Cyp26b1       | -1.45 | 0.00 | 0.0000 |
| Gkn2          | -1.45 | 0.00 | 0.0203 |
| Gpnmb         | -1.48 | 0.00 | 0.0006 |
| Trim34b       | -1.58 | 0.00 | 0.0052 |
| Tdrd6         | -1.69 | 0.00 | 0.0000 |
| Rmrp          | -2.04 | 0.00 | 0.0023 |
| Itih4         | -2.25 | 0.00 | 0.0001 |
| Reg3a         | -2.33 | 0.00 | 0.0080 |
| Reg3b         | -3.72 | 0.00 | 0.0000 |
| Tex15         | -3.90 | 0.00 | 0.0000 |
| Reg2          | -4.28 | 0.00 | 0.0000 |



Golson et al., Supplementary Figure 1
